# Supplementary material for: A universal split spinach aptamer (USSA) for nucleic acid analysis and DNA computation
Source: Royal Society of Chemistry journal article supplement (doi:10.1039/c7cc01540b), 2017-01-01
Supplement: c7cc01540b1.pdf [file c7cc01540b1.pdf]

## Supporting materials

# Universal Split Spinach Aptamer (USSA) for Nucleic Acid Analysis and DNA Computation

Nanami Kikuchi<sup>1</sup> and Dmitry M. Kolpashchikov<sup>1,2</sup>

<sup>1</sup>Chemistry Department, University of Central Florida, Orlando, 32816, Florida, USA

<sup>2</sup>National Center for Forensic Science and Burnett School of Biomedical Sciences, University of Central Florida, Orlando, 32816, Florida, USA

### Table of content

- 1) Materials and instruments
- 2) Table S1: oligonucleotides used in this study
- 3) Detailed Experimental Procedure
- 4) Figure S1. Design of USSA probe
- 5) Figure S2-S4. Suboptimal designs of USSA analyzing *Mtb*. F11/KZN analyte
- 6) Figure S5. Analysis of long analyte using USSA probe
- 7) References

**1. Materials and instruments.** All oligonucleotides were purchased from Integrated DNA Technologies, Inc. (Coralville, IA). DNase/RNase free water was purchased from Fisher Scientific and used for all assays including buffers, and for dissolution of oligonucleotides. Concentrations of oligonucleotide were determined based on UV light absorption at 260 nm. DFHBI was purchased from Lucerna, Inc. (New York, NY), KCl and MgCl<sub>2</sub> were purchased from Fisher Scientific. Trizma Hydrochloride (Tris-HCl), pH 7.40 was purchased from Sigma Aldrich. Two 2× Spinach buffer were prepared: 2 × Spinach Buffer 1 (20 mM Tris-Cl, pH 7.4, 200 mM KCl, 10 mM MgCl<sub>2</sub>); 2 × Spinach Buffer 2 (20 mM Tris-HCl, pH 7.4, 200 mM KCl, 100 mM MgCl<sub>2</sub>). All fluorescent spectra were taken using Fluorescence Spectrometer LS55 (PerkinElmer). Otherwise noted, excitation wavelength was set to 450 nm and emission was taken at 500 nm.

**2. Table S1: oligonucleotides used in this study**

| Name                          | Sequence                                                                                                                                                                        | Purification |
|-------------------------------|---------------------------------------------------------------------------------------------------------------------------------------------------------------------------------|--------------|
| <b>SSA_m</b>                  | 5'-gtg ttg tgt /TEG/ UGG UGA AGG ACG GGU CCA GU                                                                                                                                 | SD           |
| <b>SSA_f</b>                  | 5'-ACU GUU GAG UAG AGU GUG AGC UCC Gca gtg gcc cat<br>acc catg c                                                                                                                | SD           |
| <b>Adp_m</b>                  | aca aga tcg /TEG/ cca ctg aca caa cac                                                                                                                                           | SD           |
| <b>Adp_f</b>                  | atg ggt atg ggg atct acg ggt t                                                                                                                                                  | SD           |
| <b>A<sub>m</sub>_DNA</b>      | aac ccg tag atc cga tct tgt g                                                                                                                                                   | SD           |
| <b>A<sub>mm</sub>_DNA</b>     | aac ccg tag atc cga act tgt g                                                                                                                                                   | SD           |
| <b>A<sub>m</sub>_RNA</b>      | AAC CCG UAG AUC CGA UCU UGU G                                                                                                                                                   | SD           |
| <b>A<sub>mm</sub>_RNA</b>     | AAC CCG UAG AUC CGA ACU UGU G                                                                                                                                                   | SD           |
| <b>Adp_m_NOR1</b>             | at ggg tat ggg c gtc ggc gct tgt                                                                                                                                                | SD           |
| <b>Adp_f_NOR1</b>             | agcgccgactgttggc atacgtaagtatcc gcca aca cca ctg aca caa cac                                                                                                                    | SD           |
| <b>I1</b>                     | gcg gat cac tta cgt atg cca ac                                                                                                                                                  | SD           |
| <b>I2</b>                     | ccc aca agc gcc gac                                                                                                                                                             | SD           |
| <b>Mtb. F11</b>               | ggg ttgaccc aca agc gcc gac tgt t ggc g ctg                                                                                                                                     | SD           |
| <b>Mtb. KZN</b>               | ggg ttgaccc aca agc gcc gac tgt c ggc g ctg                                                                                                                                     | SD           |
| <b>f3</b>                     | gcg cca aca aca caa cac                                                                                                                                                         | SD           |
| <b>f4</b>                     | gcg cca aca a ctg aca caa cac                                                                                                                                                   | SD           |
| <b>f5</b>                     | gcg cca aca ca ctg aca caa cac                                                                                                                                                  | SD           |
| <b>f6</b>                     | gcg cca aca cca ctg aca caa cac                                                                                                                                                 | SD           |
| <b>f6peg</b>                  | gcg cca aca/TEG/ cca ctg aca caa cac                                                                                                                                            | SD           |
| <b>m3</b>                     | tat ggg cca ctg gtc ggc gct tgt                                                                                                                                                 | SD           |
| <b>m4</b>                     | t ggg tat ggg cc gtc ggc gct tgt                                                                                                                                                | SD           |
| <b>m5</b>                     | at ggg tat ggg c gtc ggc gct tgt                                                                                                                                                | SD           |
| <b>m6</b>                     | tat ggg tat ggg gtc ggc gct tgt                                                                                                                                                 | SD           |
| <b>m6peg</b>                  | tat ggg tat ggg /TEG/ gtc ggc gct tgt                                                                                                                                           | SD           |
| <b>Amel Y</b>                 | c ccagtttaa gctctgatgg tt ggcctcaa gctgtgttg ctcagcacc ctctgcctg<br>accattcgga t tgactctt cctcct aaat a tgge tgtaa gtttattcat tcatgaacca<br>ctgctcagga ag gtccatg aaagggcaaa aa | SD           |
| <b>Amel Y_mut<br/>(A → G)</b> | c ccagtttaa gctctgatgg tt ggcctcaa gctgtgttg ctcagcacc ctctgcctg<br>accattcgga t tgactctt cctcct aaat g tgge tgtaa gtttattcat tcatgaacca                                        | SD           |

|                    |                                                                       |    |
|--------------------|-----------------------------------------------------------------------|----|
|                    | ctgctcagga ag gttccatg aaagggcaaaa aa                                 |    |
| <b>Adp_f_amely</b> | at ggg tat ggg <u>agg agg aaa gag tca atc cga atg gtc agg cag gag</u> | SD |
| <b>Adp_m_amely</b> | <u>gccca t attt/TEG</u> /cca ctg aca caa cac                          | SD |

TEG-triethylene glycol linkers; SD, standard desalting; DNA sequences are in low case; SNS sites are bold underlined; analyte binding arms are underlined.

### 3. Detailed Experimental Procedure

**General Fluorescent assay for miDNA and miRNA.** For DNA analyte, the reaction mixtures contained **DFHBI** (1  $\mu$ M) **SSA\_m** (3.6  $\mu$ M) and **SSA\_f** (2  $\mu$ M) strands, **Adp\_m** (0.8  $\mu$ M) and **Adp\_f** (4.0  $\mu$ M) and the indicated concentration of analyte in 60  $\mu$ L of 1  $\times$  Spinach 1 or Spinach 2 buffers. Control samples contained only **DFHBI** (1  $\mu$ M) or **DFHBI** (1  $\mu$ M) and **SSA\_m** (3.6  $\mu$ M) and **SSA\_f** (2  $\mu$ M) and **Adp\_m** (0.8  $\mu$ M) and **Adp\_f** (4.0  $\mu$ M) strands. For RNA analyte, **DFHBI** (0.5  $\mu$ M) **SSA\_m** (3.6  $\mu$ M) and **SSA\_f** (2.0  $\mu$ M) and the indicated concentration of analyte in 60  $\mu$ L of Spinach 2 buffers. Control samples contained only **DFHBI** (0.5  $\mu$ M) or **DFHBI** (0.5  $\mu$ M) **SSA\_m** (3.6  $\mu$ M) and **SSA\_f** (2.0  $\mu$ M) and **Adp\_m** (0.8  $\mu$ M) and **Adp\_f** (4.0  $\mu$ M) strands. All samples were incubated at room (22.5°C) temperature. Fluorescent spectra were recorded at 430-600 nm, with excitation at 450 nm after indicated incubation times. Data of three independent experiments were processed using Microsoft Excel.

**General Fluorescent assay for Mtb.F11 and Mtb.KZN.** **DFHBI** (2  $\mu$ M) **SSA\_m** (3.6  $\mu$ M) and **SSA\_f** (2  $\mu$ M) strands, **Adp\_m** (0.8  $\mu$ M) and **Adp\_f** (4.0  $\mu$ M) and the indicated concentration of analyte in 60  $\mu$ L of 1  $\times$  Spinach 1 or Spinach 2 buffers. Control samples contained only **DFHBI** (2  $\mu$ M) or **DFHBI** (2  $\mu$ M) and **SSA\_m** (3.6  $\mu$ M) and **SSA\_f** (2  $\mu$ M) strands. All samples were incubated at room (22.5°C) temperature. Fluorescent spectra were recorded at 430-600 nm, with excitation at 450 nm after indicated incubation times. Data of three independent experiments were processed using Microsoft Excel.

**Time dependence of USSA fluorescent response.** **DFHBI**, **SSA\_m** and **SSA\_f** strands, **Adp\_m** and **Adp\_f** and 400 nM for DNA analyte, 100 nM for RNA analyte in 60  $\mu$ L of 1  $\times$  Spinach 2 buffers. Fluorescence measurements were taken after 0, 1, 2, 5, 10, 25 and 40 min. Control samples were ran parallel with the samples. Data of three independent experiments were processed using Microsoft Excel.

**Determining Limit of Detection.** **DFHBI**, **SSA\_m** and **SSA\_f** strands, **Adp\_m** and **Adp\_f** matched DNA (1.4, 5.5, 14, 28, 138, 275 nM or 5.5  $\mu$ M) or RNA (0.5, 2, 5, 10, 50, 100, 250 nM, 1  $\mu$ M) analytes in 60  $\mu$ L of 1  $\times$  Spinach 2 buffers. matched or mismatched analyte was added for a total volume of 60  $\mu$ L reaction mixture. Fluorescent spectra were measured after 30 min. Control samples were ran parallel with the samples. Data of three independent experiments were processed using Microsoft Excel.

**Selectivity Assay.** For miDNA and miRNA, **DFHBI**, **SSA\_m** and **SSA\_f** strands, **Adp\_m** and **Adp\_f**, and 100 nM matched or mismatched analytes in 60  $\mu$ L of 1  $\times$  Spinach 2 buffers. For

*Mtb.F11* and *Mtb.KZN*, **DFHBI**, **SSA\_m** and **SSA\_f** strands, **Adp\_m** and **Adp\_f**, and the indicated concentration of analyte in 60  $\mu\text{L}$  of  $1 \times$  Spinach 2 buffers. Control samples were run parallel with the samples. Fluorescent spectra were measured after 30 min. Data of three independent experiments were processed using Microsoft Excel.

**NOT and NOR logic gates.** **DFHBI** (0.5  $\mu\text{M}$ ), **SSA\_m** and **SSA\_f** strands (2.0  $\mu\text{M}$ ), **Adp\_f\_NOR1** (1.0  $\mu\text{M}$ ) and **Adp\_m\_NOR1** (0.3  $\mu\text{M}$ ), were added to 30  $\mu\text{L}$  of  $2 \times$  Spinach 2 buffer. Total volume was adjusted to 50  $\mu\text{L}$  by  $\text{H}_2\text{O}$  and 5  $\mu\text{L}$  each of Input **I1** and **I2** (1.0  $\mu\text{M}$ ) were added for a total volume of 60  $\mu\text{L}$  reaction mixture. Control samples were run parallel with the samples. Fluorescent spectra were measured after 30 min. Data of three independent experiments were processed using Microsoft Excel.

#### 4. Figure S1. Design of USSA probe

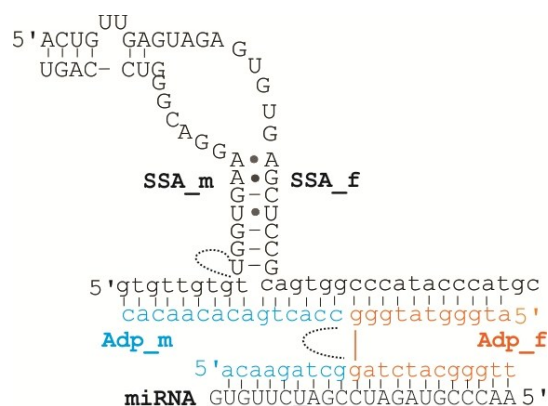

**Figure S1.** Design of USSA with miRNA analyte. Dotted black line is the triethylene glycol linkers. Ribonucleotides are shown in upper case; deoxyribonucleotide are in low case. SNP location on miRNA underlined.

We initially designed the adapter strands as indicated in Figure S2A but showed no selectivity towards fully matched analyte. Therefore strand **Adp\_m** in Figure S1 and the main paper crossed over and was made complementary to **SSA\_f** by 4 nucleotides which reduced the fluorescence signal of single mismatched analyte (Figure S2B). We also inserted a triethyleneglycol (TEG) linker connecting the SSA binding arm and the analyte binding arm which allowed great increase in the selectivity of the USSA (Figure S3C). Magnesium concentration in Spinach buffer was increased from 5 mM to 50 mM which allowed greater stability for hybridization which inducing higher signal for fully matched analyte (Figure S4). For any TEG containing strand combination, lower concentration of adapter-f was used which allowed lowering single mismatch analyte signal (Figure S4). We concluded that USSA in which strand\_f is complementary to SSA\_f by 6 nucleotides produced the greatest analyte dependent fluorescent increase (Figure S4).



**Figure S3: Suboptimal designs of USSA analyzing *Mtb. F11/KZN* analyte**

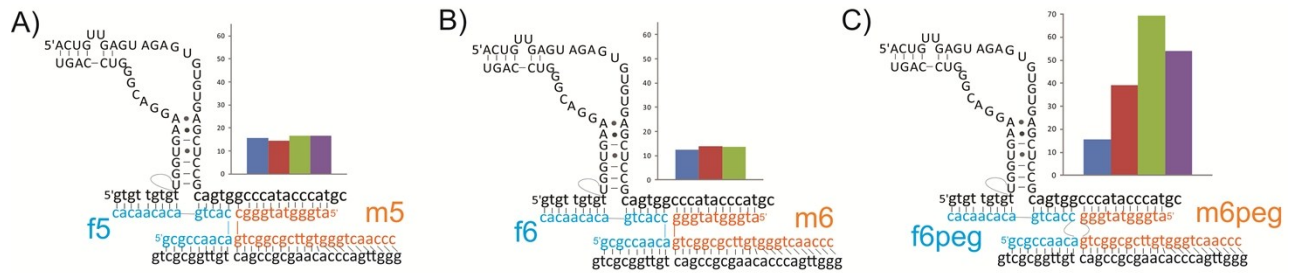

**Figure S3.** Fluorescence complexes of USSA with the DNA analyte and responses of the three different combinations of stands m and f. Data for each combination is shown on the right side of each panel. Samples contained 3.6  $\mu\text{M}$  SSA\_f; 2.0  $\mu\text{M}$  SSA\_m; 4.0  $\mu\text{M}$  Adp\_f; 4.0  $\mu\text{M}$  Adp\_m; 6.0  $\mu\text{M}$  analyte; 10  $\mu\text{M}$  DFHBI; in 2  $\times$  Spinach Buffer 1. Emission spectrum ( $\lambda_{\text{ex}} = 450 \text{ nm}$ ) were collected after 30 min at 22.5°C. A, B, C) The bar graph shows the fluorescence intensity of samples containing DFHBI dye, no analyte (SSA+Adp), Am\_DNA (SSA+Adp+matched analyte), and Amm\_DNA (SSA+Adp+mismatched analyte). C) Dashed lines represent triethylene glycol (TEG) linkers.

**Figure S4: Suboptimal designs of USSA analyzing *Mtb. F11/KZN* analyte**

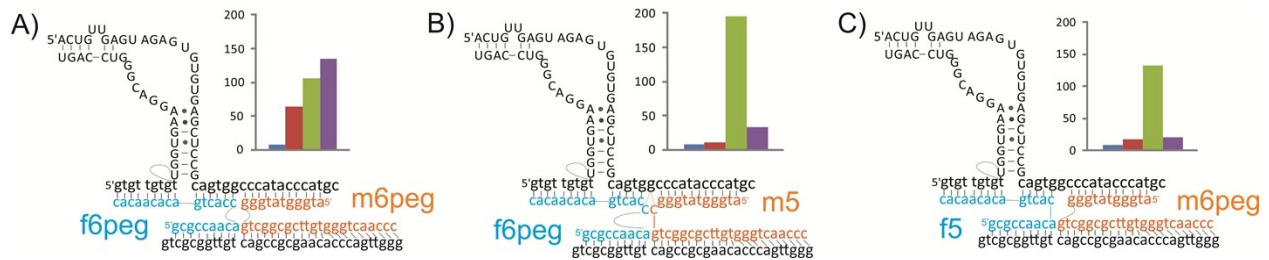

**Figure S4.** Fluorescence complexes of USSA with the DNA analyte and responses of the two different combinations of stands m and f. Data for each combination is shown on the right side of each panel. Samples contained 3.6  $\mu\text{M}$  SSA\_f; 2.0  $\mu\text{M}$  SSA\_m; 0.4  $\mu\text{M}$  Adp\_f; 4.0  $\mu\text{M}$  Adp\_m; 6.0  $\mu\text{M}$  analyte; 5  $\mu\text{M}$  DFHBI; in 2  $\times$  Spinach Buffer 2. Emission spectrum ( $\lambda_{\text{ex}} = 450 \text{ nm}$ ) were collected after 30 min at 22.5°C. A, B, C) The bar graph shows the fluorescence intensity of samples containing DFHBI dye, no analyte (SSA+Adp), Am\_DNA (SSA+Adp+matched analyte), and Amm\_DNA (SSA+Adp+mismatched analyte). Dashed lines represents TEG linkers.

6) Figure S5. Analysis of long analyte using USSA probe

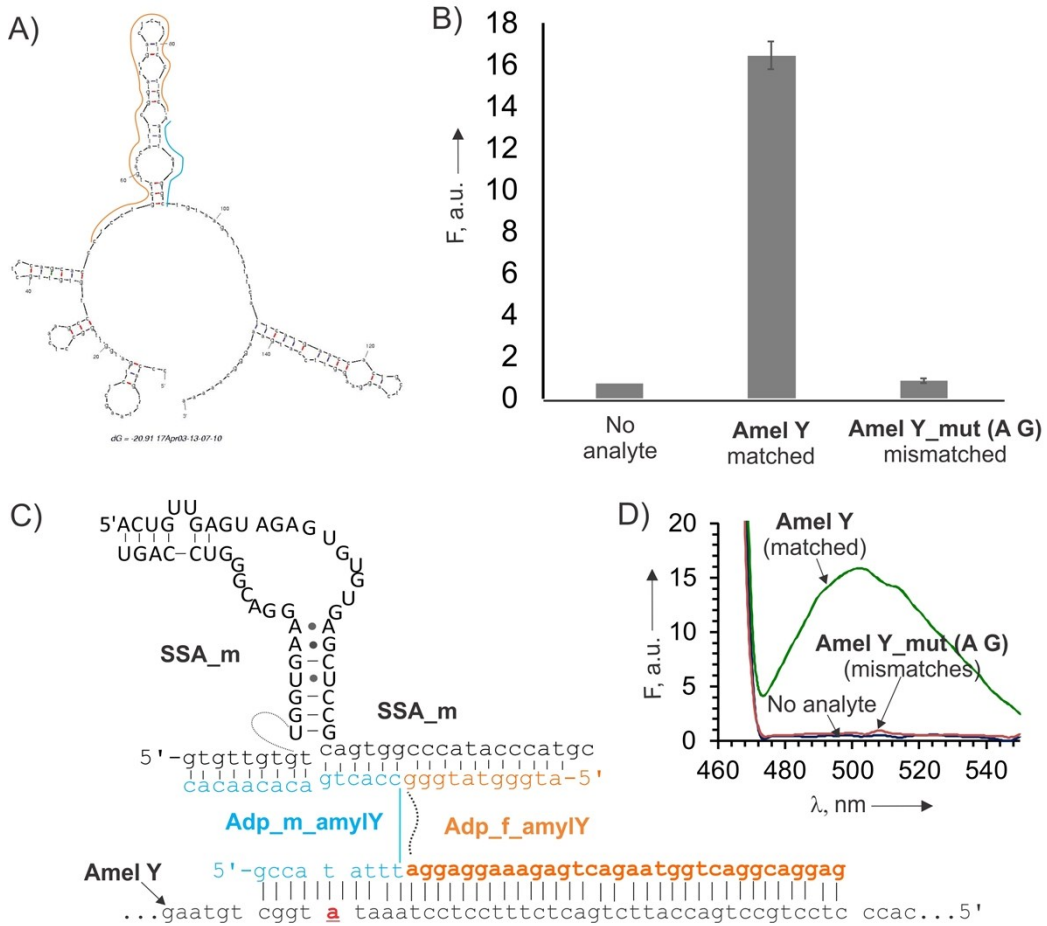

**Figure S5.** Detection of a long DNA analyte by USSA\_AMELY probe. A) Secondary structure of 152 nt AMELY analyte predicted by mfold.<sup>1</sup> The fragment bound by *Adp\_f\_amyly* and *Adp\_m\_amyly* are indicated by cyan and orange lines respectively. B) Fluorescent response of the USSA\_AMELY probe in the presence of fully matched AMEL Y or single base mismatched Amel Y\_mut (A → G) analyte. ‘No analyte’ is the probe response in the absence of analytes (negative control). The assay conditions: DFHBI (1 μM), SSA\_m (2 μM), SSA\_f (2 μM), Adp\_f\_amyly (2 μM), Adp\_m\_amyly (0.5 μM) in Spinach Buffer 2. C) The predicted secondary structure of USSA\_AMELY probe with fully matched AMELY analyte. Single nucleotide substitution site is red underlined. For full sequence of Amel Y analyte see Table S1. D) Representative spectrums of USSA\_AMELY probe in the presence of matched Amel Y (green) or mismatched (Amel Y\_mut (A → G)) analytes. Blue line is USSA\_AMELY probe in the absence of the analyte (negative control)

In order to prove that SSA is suitable for the detection of long structure-forming analytes, we designed a probe for detection of AMELY (Figure S5A). DNA fragments of AMEL X and AMEL Y genes, which code for the amelogenin – gene involved in the development of the enamel.<sup>2</sup> Different amelogenin sequences are located in X and Y chromosomes, which makes this gene to be a good marker for sex determination, in forensic and anthropological applications.<sup>3</sup> The analyte binding arm of the adaptor strand *Adp\_m\_amyly* was designed to unwind the secondary structure

of the analyte (Figure 3SA). The analyte binding arm of **Adp\_m\_ameY** was short to enable highly specific hybridization of signal nucleotide substitution. The signal-to-background ratio was ~20 under optimized concentrations of the USSA components (Figure S5B). Importantly, a single base substituted **Adp\_m\_ameY** produced fluorescence only slightly above the background (Figure S5B, last bar).

## 7) References

- 1) M. Zuker, Mfold web server for nucleic acid folding and hybridization prediction. *Nucleic Acids Res.*, 2003, **31**, 3406-3415.
- 2) B. A. Álvarez-Sandoval, L. R. Manzanilla, R. Montiel, Sex determination in highly fragmented human DNA by high-resolution melting (HRM) analysis. *PLoS One*, 2014, **9**, e104629.
- 3) H. Nogami, H. Tsutsumi, T. Komuro, R. Mukoyama Rapid and simple sex determination method from dental pulp by loop-mediated isothermal amplification. *Forensic Sci Int Genet.* 2008, **2**, 349-353.
